# Supplementary material for: Long-Term Compost Amendment Changes Interactions and Specialization in the Soil Bacterial Community, Increasing the Presence of Beneficial N-Cycling Genes in the Soil
Source: MDPI journal article supplement (doi:10.3390/agronomy12020316), 2022-01-26
Supplement: s1 [file s1]

**Long-term compost amendment changes interactions and specialization in the soil bacterial community, activating beneficial N-cycling genes in the soil.**

Jessica Cuartero<sup>1a</sup>, Onurcan Özbolat<sup>2</sup>, Virginia Sánchez-Navarro<sup>3</sup>, Julia Weiss<sup>2</sup>, Raúl Zornoza<sup>3</sup>, Jose Antonio Pascual<sup>1</sup>, Juana-María Vivo<sup>4</sup>, Margarita Ros<sup>1</sup>

<sup>1</sup> Centre of Edaphology and Applied Biology of the Segura (CSIC). University Campus of Espinardo, 30100 Murcia, Spain

<sup>2</sup> Institute of Plant Biotechnology, Technical University of Cartagena, Plaza del Hospital s/n, 30202 Cartagena, Spain

<sup>3</sup> Department of Agricultural Science, Universidad Politécnica de Cartagena, Paseo Alfonso XIII 48, 30203 Cartagena, Spain

<sup>4</sup> Department of Statistics and Operations Research, University of Murcia, CMN & IMIB-Arrixaca, 30100 Murcia, Spain

<sup>a</sup> [jessica.cuartero@um.es](mailto:jessica.cuartero@um.es); ORCID: 0000-0002-5378-5310

**Table S1. Management characteristics of the three cropping systems.**

| Cropping system                      | Conv                                                                                                                                                                                                                                                                             | Org_C                                                                               | Org_M                            |
|--------------------------------------|----------------------------------------------------------------------------------------------------------------------------------------------------------------------------------------------------------------------------------------------------------------------------------|-------------------------------------------------------------------------------------|----------------------------------|
| Geographical coordinates             | 37° 48' 18.5" N; 0° 51' 49.2" W                                                                                                                                                                                                                                                  | 37° 51' 39.3" N, 0° 54' 03.3" W                                                     | 37° 49' 30.2" N, 0° 52' 28.4" W  |
| Crop (2017-2018)                     | Brassica oleracea var. sabellica                                                                                                                                                                                                                                                 |                                                                                     |                                  |
| Harvest                              | Manual on 20-25 February 2018. Crop residues were incorporated into the soil.                                                                                                                                                                                                    |                                                                                     |                                  |
| Crops (previous years)               | Apium graveolens / Cucumils melo (2016/2017)<br>Lactuca sativa / Brassica oleracea var. Italica (2015/2016)<br>Apium graveolens / Cucumils melo (2014/2015)<br>Brassica oleracea var. Italica / Capsicum annum (2013/2014)<br>Foeniculum vulgare/ Cucurbita moschata (2012/2013) |                                                                                     |                                  |
| Organic amendments (amount per year) | 15,000 kg ha <sup>-1</sup> sheep manure                                                                                                                                                                                                                                          | 10,000 kg ha <sup>-1</sup> sheep compost; compost tea*                              | 15,000 kg ha <sup>-1</sup> sheep |
| Fertilizers (amount per year)        | 15 kg ha <sup>-1</sup> ENTEC solub 21 (ammonium sulfate with inhibition of nitrification); 10 L ha <sup>-1</sup> phosphoric acid; 15 kg ha <sup>-1</sup> calcium nitrate; 10L ha <sup>-1</sup> nitric acid                                                                       | 10 L ha-1 EcoZen NPK 2-2-7 (aminoacids); 10 L ha-1 Sunfol veg agri 12% (aminoacids) |                                  |
| Pesticides                           | Linuron; Indoxacarb 30%; Cypermethrin; Lambda cihalotrin 10%; Imidacloprid 20%; Spinosad; Azadirachtin 3.2%; Emamectin 0.85%; Clortalonil 50%; Difenoconazol 25%; Azoxystrobin 2.5%; Propamocarb 52%; Ciflufenamid<br><br>No application of chemical pesticides                  |                                                                                     |                                  |

Conv, Conventional system; Org\_C, Organic cultivation with sheep manure compost and compost tea; Org\_M, Organic cultivation with sheep manure. \*The compost tea was made on each farm by steeping mature compost in water for 24h.

**Table S2. Abundance of phyla in the different modules (expressed in percent)**

| Phylum           | C1    | C2    | C3    | C4    | C5    | C6    | C7    | C8    | C9    | C10   | C11   | C12   | C13   |       |      |
|------------------|-------|-------|-------|-------|-------|-------|-------|-------|-------|-------|-------|-------|-------|-------|------|
| Acidobacteria    | 7.7   | 1.25  |       |       | 4.35  |       | 22.22 | 5.88  |       |       |       | 9.09  | 3.89  |       |      |
| Actinobacteria   | 17.95 | 20    | 38.46 | 35    | 30.43 | 30    | 11.11 | 11.76 | 41.67 | 42.85 | 29.41 | 9.09  | 15.58 |       |      |
| Bacteriodes      | 7.69  | 6.25  | 7.69  | 10    | 8.70  | 5     | 11.11 | 11.76 |       |       |       | 18.18 | 24.67 |       |      |
| BRC1             | 2.56  |       |       |       |       |       |       |       |       |       |       |       |       |       |      |
| Chloroflexi      | 7.69  | 1.25  | 3.85  |       |       |       |       | 11.76 |       |       | 11.76 |       | 3.89  |       |      |
| Firmicutes       | 10.26 | 16.25 |       |       |       | 5     | 11.11 |       |       |       | 35.29 | 9.09  | 3.89  |       |      |
| Proteobacteria   | 43.59 | 37.5  | 30.77 | 25    | 56.52 | 50    | 22.22 | 41.18 | 41.67 | 28.57 | 35.29 | 45.45 | 33.77 |       |      |
| TM7              | 2.56  | 2.5   |       |       |       |       |       |       |       | 14.29 |       |       |       |       |      |
| Cyanobacteria    |       | 1.25  |       |       |       |       |       |       |       | 14.28 |       |       |       |       |      |
| Elusimicrobia    |       | 1.25  | 3.85  |       |       |       |       |       |       |       |       |       |       |       |      |
| Gemmatimonadetes |       | 7.5   |       |       |       |       |       | 5.88  |       |       |       |       | 1.30  |       |      |
| Nitrospirae      |       | 1.25  |       |       |       |       |       |       |       |       |       |       | 1.30  |       |      |
| Plantcomycetes   |       | 2.5   |       | 15    |       |       | 11.11 | 5.88  | 8.33  |       |       |       |       |       |      |
| Verrucomicrobia  |       | 1.25  | 3.85  |       |       | 5     |       |       | 8.33  |       | 5.88  |       | 7.79  |       |      |
| Armatimonadetes  |       |       | 3.85  |       |       |       |       |       |       |       |       |       | 1.29  |       |      |
| NKB19            |       |       | 3.85  |       |       |       |       |       |       |       |       |       | 1.30  |       |      |
| OP11             |       |       | 3.85  |       |       |       |       |       |       |       |       |       |       |       |      |
| Kazan-3B-28      |       |       |       | 5     |       |       |       |       |       |       |       |       |       |       |      |
| FBP              |       |       |       |       |       | 5     |       |       |       |       |       |       |       |       |      |
| Chlorobi         |       |       |       |       |       |       | 11.11 |       |       |       |       |       | 1.30  |       |      |
| WS3              |       |       |       |       |       |       |       | 5.88  |       |       |       |       |       |       |      |
| Thermi           |       |       |       |       |       |       |       |       |       |       | 5.88  |       |       |       |      |
| TM6              |       |       |       |       |       |       |       |       |       |       |       | 9.09  |       |       |      |
| Total nodes      | 39    | 80    | 26    | 20    | 24    | 20    | 9     | 17    | 12    | 7     | 17    | 11    | 77    |       |      |
|                  |       |       |       |       |       |       |       |       |       |       |       |       |       |       |      |
| Phylum           | OC1   | OC2   | OC3   | OC4   | OC5   | OC6   | OC7   | OC8   | OC9   | OC10  | OC11  | OC12  | OC13  | OC14  | OC15 |
| Acidobacteria    | 2.13  |       | 4.25  | 10.53 |       | 3.7   |       |       | 6.25  | 25    |       | 33.33 |       | 14.28 |      |
| Actinobacteria   | 27.66 | 36.11 | 14.89 | 10.53 | 25    | 33.30 | 33.33 | 27.27 | 8.75  | 25    | 16.67 | 16.67 | 30    | 14.28 | 50   |
| Bacteriodes      | 6.38  | 16.67 | 6.38  | 15.79 |       | 3.70  |       |       | 5     |       |       |       | 20    | 7.14  |      |
| BRC1             |       |       |       |       |       |       | 11.11 |       |       |       |       |       |       |       |      |
| Chloroflexi      | 10.64 |       |       |       |       | 7.41  |       |       | 2.5   |       |       |       | 10    |       |      |
| Firmicutes       | 6.38  | 11.11 | 8.51  | 5.26  | 12.5  | 14.81 |       | 9.09  | 7.5   |       |       |       |       |       |      |
| Proteobacteria   | 40.42 | 25    | 42.55 | 36.84 | 56.25 | 22.22 | 33.33 | 54.54 | 35    | 25    | 83.33 | 33.33 | 30    | 64.29 | 25   |
| TM7              | 2.12  | 2.78  | 2.13  |       |       |       |       |       |       |       |       |       |       |       |      |
| Cyanobacteria    |       |       |       | 5.26  |       | 3.70  |       |       | 1.25  |       |       |       |       |       | 12.5 |
| Elusimicrobia    |       |       |       |       |       |       |       |       | 3.75  |       |       |       |       |       |      |
| Gemmatimonadetes |       | 2.78  | 2.13  |       |       |       | 11.11 | 9.09  | 8.75  | 12.5  |       |       |       |       |      |
| Nitrospirae      |       |       |       |       |       |       | 11.11 |       | 1.25  |       |       |       |       |       |      |
| Planctomycetes   |       | 2.78  | 8.51  |       | 6.25  |       |       |       | 8.75  |       |       |       | 10    |       | 12.5 |
| Verrucomicrobia  | 2.13  | 2.78  | 2.13  | 10.53 |       |       |       |       | 6.25  | 12.5  |       |       |       |       |      |
| Armatimonadetes  |       |       | 2.13  |       |       |       |       |       | 3.75  |       |       |       |       |       |      |
| NKB19            |       |       | 2.13  |       |       |       |       |       |       |       |       |       |       |       |      |
| Chlorobi         |       |       | 4.25  |       |       | 3.70  |       |       |       |       |       |       |       |       |      |
| Thermi           | 2.13  |       |       |       |       |       |       |       |       |       |       |       |       |       |      |
| BHI80-139        |       |       |       | 5.26  |       |       |       |       |       |       |       |       |       |       |      |
| OD1              |       |       |       |       |       | 3.70  |       |       |       |       |       |       |       |       |      |
| GN02             |       |       |       |       |       | 3.70  |       |       |       |       |       |       |       |       |      |
| OP3              |       |       |       |       |       |       |       |       | 1.25  |       |       |       |       |       |      |
| Total nodes      | 47    | 36    | 47    | 19    | 16    | 27    | 9     | 11    | 80    | 8     | 6     | 6     | 10    | 14    | 8    |
|                  |       |       |       |       |       |       |       |       |       |       |       |       |       |       |      |
| Phylum           | OM1   | OM2   | OM3   | OM4   | OM5   | OM6   | OM7   | OM8   | OM9   | OM10  | OM11  | OM12  |       |       |      |
| Acidobacteria    |       |       | 3.45  | 11.54 |       | 8.51  |       |       | 3.70  | 28.57 | 10.34 | 6.67  |       |       |      |
| Actinobacteria   | 36.36 | 13.79 | 10.34 | 7.69  | 42.10 | 23.40 | 25    | 35.29 | 11.11 |       | 13.79 | 13.33 |       |       |      |
| Bacteriodes      | 6.06  |       | 27.59 |       |       | 6.39  | 9.38  | 5.88  | 3.70  |       | 6.90  | 6.67  |       |       |      |
| BRC1             |       |       |       |       |       | 2.13  |       |       |       |       |       |       |       |       |      |
| Chloroflexi      |       | 6.90  | 3.45  |       |       | 2.13  | 12.5  |       | 11.11 | 14.29 | 3.45  |       |       |       |      |
| Firmicutes       |       | 20.69 |       |       | 5.26  | 4.25  | 12.5  |       | 7.41  | 14.29 | 3.45  | 13.33 |       |       |      |

|                  |       |       |       |       |       |       |       |       |       |       |       |       |
|------------------|-------|-------|-------|-------|-------|-------|-------|-------|-------|-------|-------|-------|
| Proteobacteria   | 45.45 | 44.83 | 41.38 | 38.46 | 36.84 | 27.66 | 34.38 | 17.65 | 48.15 | 14.29 | 37.93 | 46.67 |
| TM7              |       |       | 3.45  |       |       |       |       | 5.88  |       |       |       |       |
| Cyanobacteria    | 3.03  |       |       |       |       | 4.25  |       | 5.88  |       |       |       |       |
| Elusimicrobia    | 3.03  |       | 3.45  |       |       | 2.13  |       |       |       |       |       |       |
| Gemmatimonadetes | 3.03  |       |       | 19.23 |       | 6.38  | 3.13  |       |       |       | 6.90  | 6.67  |
| Nitrospirae      |       |       |       | 3.85  |       |       |       | 5.88  |       |       |       |       |
| Planctomycetes   | 3.03  | 10.34 | 3.45  | 7.69  | 10.53 | 4.25  |       | 5.88  | 3.70  |       | 3.45  |       |
| Verrucomicrobia  |       | 3.45  | 3.45  | 3.84  |       | 2.13  | 3.13  | 5.88  | 3.70  |       | 10.34 |       |
| Armatimonadetes  |       |       |       |       |       | 2.12  |       | 5.88  |       |       |       |       |
| NKB19            |       |       |       |       |       |       |       | 5.88  |       |       |       |       |
| Chlorobi         |       |       |       |       | 5.26  |       |       |       |       | 14.29 |       |       |
| Thermi           |       |       |       |       |       |       |       |       | 3.70  |       |       |       |
| OP11             |       |       |       |       |       |       |       |       | 3.70  |       |       |       |
| WS3              |       |       |       |       |       | 2.13  |       |       |       |       |       |       |
| WPS-2            |       |       |       |       |       |       |       |       |       | 14.29 |       |       |
| Fibrobacteres    |       |       |       | 3.85  |       |       |       |       |       |       |       |       |
| OD1              |       |       |       |       |       |       |       |       |       |       | 3.45  |       |
| Tenericutes      |       |       |       |       |       |       |       |       |       |       |       | 6.67  |
| OP3              |       |       |       |       |       | 2.13  |       |       |       |       |       |       |
| Total nodes      | 33    | 29    | 29    | 26    | 19    | 47    | 32    | 17    | 27    | 7     | 29    | 15    |

(C) Conv, Conventional system; (OC) Org\_C, Organic cultivation with sheep manure compost and compost tea; (OM) Org\_M, Organic cultivation with sheep manure.

**Table S3. Subnetworks of the eight most abundant OTUs and their first neighbor nodes in the three cropping systems**

| OTU | Cropping System Nodes |       |       | Cropping System Edges |             |             | Phyla            |
|-----|-----------------------|-------|-------|-----------------------|-------------|-------------|------------------|
|     | Conv                  | Org_C | Org_M | Conv                  | Org_C       | Org_M       |                  |
| 436 | 3                     | 7     | 4     | 2 np – 1 pp           | 1 np – 6 pp | 1 np – 3 pp | Proteobacteria   |
| 605 | 7                     | -     | -     | 1 np – 6 pp           | -           | -           | Proteobacteria   |
| 110 | 2                     | 9     | 4     | 1 np – 1 pp           | 5 np – 4 pp | 1 np – 3 pp | Actinobacteria   |
| 003 | 1                     | 3     | 13    | 1 pp                  | 1 np – 2 pp | 13 pp       | Acidobacteria    |
| 324 | 8                     | 1     | 6     | 8 np                  | 1 pp        | 6 pp        | Gemmatimonadetes |
| 438 | 1                     | 6     | 4     | 1 np                  | 2 np – 4 pp | 3 pp        | Proteobacteria   |
| 486 | 8                     | 8     | 4     | 6 np – 2 pp           | 4 np – 4 pp | 1 np – 3 pp | Proteobacteria   |
| 174 | 5                     | -     | 3     | 3 np – 2 pp           | -           | 3 pp        | Bacterioidetes   |
| 426 | -                     | 12    | -     | -                     | 4 np – 8 pp | -           | Proteobacteria   |
| 172 | -                     | -     | 3     | -                     | -           | 3 pp        | Bacterioidetes   |

np, negative edges; pp, positive edges; - none detected; Conv, Conventional system; Org\_C, Organic cultivation with sheep manure compost and compost tea; Org\_M, Organic cultivation with sheep manure

**Table S4. Classification of generalists in the three cropping systems**

| Cropping system | OTU ID   | Generalist | Phylum          | Class               | Order               | Family               | Genus                |
|-----------------|----------|------------|-----------------|---------------------|---------------------|----------------------|----------------------|
| Conv            | OTU108   | Module Hub | Actinobacteria  | Actinobacteria      | Actinomycetales     | Nocardiodaceae       | <i>Nocardioideis</i> |
| Conv            | OTU153   | Module Hub | Actinobacteria  | Rubrobacteria       | Rubrobacterales     | Rubrobacteraceae     | <i>Rubrobacter</i>   |
| Conv            | OTU422   | Module Hub | Proteobacteria  | Alphaproteobacteria | Rhodospirillales    | Unclassified         | <i>Unclassified</i>  |
| Conv            | OTU483   | Module Hub | Proteobacteria  | Betaproteobacteria  | Methylophilales     | Methylophilaceae     | <i>Methylothera</i>  |
| Conv            | OTU085   | Connector  | Actinobacteria  | Actinobacteria      | Actinomycetales     | Micrococcaceae       | Unclassified         |
| Conv            | OTU442   | Connector  | Proteobacteria  | Alphaproteobacteria | Sphingomonadales    | Sphingomonadaceae    | <i>Sphingopyxis</i>  |
| Org_C           | OTU065 * | Module Hub | Actinobacteria  | Actinobacteria      | Actinomycetales     | Microbacteriaceae    | <i>Agromyces</i>     |
| Org_C           | OTU161   | Module Hub | Actinobacteria  | Thermoleophilia     | Solirubrobacterales | Solirubrobacteraceae | Unclassified         |
| Org_C           | OTU239   | Module Hub | Chloroflexi     | Chloroflexi         | Herpetosiphonales   | Unclassified         | Unclassified         |
| Org_C           | OTU339 * | Module Hub | NKB19           | Unclassified        | Unclassified        | Unclassified         | Unclassified         |
| Org_C           | OTU345 * | Module Hub | Planctomycetes  | BD7-11              | Unclassified        | Unclassified         | Unclassified         |
| Org_C           | OTU599 * | Module Hub | Proteobacteria  | Gammaproteobacteria | Xanthomonadales     | Xanthomonadaceae     | <i>Arenimonas</i>    |
| Org_C           | OTU461   | Connector  | Proteobacteria  | Betaproteobacteria  | Burkholderiales     | Comamonadaceae       | <i>Ramlibacter</i>   |
| Org_C           | OTU508   | Connector  | Proteobacteria  | Deltaproteobacteria | Desulfuromonadales  | Geobacteraceae       | <i>Geobacter</i>     |
| Org_M           | OTU024   | Module Hub | Actinobacteria  | Acidimicrobiia      | Acidimicrobiales    | AKIW874              | <i>Unclassified</i>  |
| Org_M           | OTU271   | Module Hub | Firmicutes      | Bacilli             | Bacillales          | Bacillaceae          | <i>Bacillus</i>      |
| Org_M           | OTU485   | Module Hub | Proteobacteria  | Betaproteobacteria  | MKC10               | Unclassified         | Unclassified         |
| Org_M           | OTU512   | Module Hub | Proteobacteria  | Deltaproteobacteria | Unclassified        | Unclassified         | Unclassified         |
| Org_M           | OTU537 * | Module Hub | Proteobacteria  | Deltaproteobacteria | Spirobacillales     | Unclassified         | Unclassified         |
| Org_M           | OTU630 * | Module Hub | Verrucomicrobia | Pedosphaerae        | Pedosphaerales      | OPB35                | Unclassified         |

Conv, Conventional cropping system; Org\_C, Organic cropping system with compost and compost tea, Org\_M, Organic cropping system with manure. " " indicates that the node was shared by Org\_C such as specialist; " " indicates that the node was shared by Org\_M such as specialist; and "\*" indicates that the node was shared by Conv such as specialist.

**Table S5. Predicted functions of the bacterial communities found in the three cropping systems (relative abundances)**

| Metabolic pathway                                        | Conv         | Org_C          | Org_M          | Anova | Kruskal-Wallis |
|----------------------------------------------------------|--------------|----------------|----------------|-------|----------------|
| Amino acid metabolism                                    | 0.23±0.00 ab | 0.24±0.00 a    | 0.19±0.01 b    | -     | **             |
| Amino acid related enzymes                               | 1.23±0.04 a  | 1.22±0.03 a    | 1.08±0.07 b*** | **    | -              |
| Bacterial toxins                                         | 0.06±0.00 ab | 0.07±0.01 a    | 0.04±0.01 b    | -     | **             |
| Biosynthesis and biodegradation of secondary metabolites | 0.07±0.00 ab | 0.08±0.01 a    | 0.06±0.01 b    | -     | **             |
| Carbon fixation photosynthetic organism                  | 0.41±0.02 ab | 0.44±0.01 a    | 0.34±0.03 b    | -     | **             |
| Carbon fixation in prokaryotes                           | 0.98±0.03 b  | 1.18±0.03 a*** | 0.62±0.01 c*** | ***   | -              |
| Nitrogen metabolism                                      | 0.69±0.03 a  | 0.73±0.02 a    | 0.50±0.04 b*** | ***   | -              |
| Lipid metabolism                                         | 0.10±0.00 ab | 0.12±0.01 a    | 0.08±0.00 b    | -     | **             |
| Nucleotide metabolism                                    | 0.03±0.00 a  | 0.03±0.00 a    | 0.02±0.00 b    | -     | **             |
| Penicillin and cephalosporin biosynthesis                | 0.07±0.00 a  | 0.07±0.00 a    | 0.05±0.00 b    | -     | **             |
| Phosphotransferase system PTS                            | 0.08±0.00 ab | 0.09±0.00 a    | 0.06±0.00 b    | -     | **             |
| Signal transduction mechanism                            | 0.42±0.02 ab | 0.45±0.02 a    | 0.32±0.01 b    | -     | **             |
| Tetracycline biosynthesis                                | 0.13±0.01 ab | 0.13±0.00 a    | 0.12±0.00 b    | -     | **             |
| Toluene degradation                                      | 0.20±0.01 ab | 0.23±0.01 a    | 0.13±0.01 b    | -     | **             |
| Sulfur metabolism                                        | 0.34±0.01 ab | 0.37±0.02 a    | 0.26±0.01 b    |       | **             |
| Benzoate degradation                                     | 0.55±0.03 b  | 0.70±0.02 a*** | 0.59±0.03 b    | ***   | -              |
| DNA replication proteins                                 | 0.76±0.01 b  | 0.80±0.01 a*** | 0.48±0.01 c*** | ***   | -              |
| Phenylalanine, tyrosine and tryptophan biosynthesis      | 0.58±0.01 ab | 0.71±0.01 a    | 0.52±0.00 b    | -     | **             |

(mean±sd; n=5 values are expressed with an e-value of 1x10<sup>-2</sup>). The mean value followed asterisks in each cropping system (\*, \*\*, \*\*\*) represents significant differences with respect to the conventional cropping system (Conv) by Dunnett's test (\*P < 0.05; \*\*P < 0.01, \*\*\*P < 0.001, respectively). The mean value followed by different letters represent significant differences between systems by Tukey's test or Dunn's Kruskal-Wallis Multiple Comparison test. Conv, Conventional cropping system; Org\_C, Organic cropping system with compost and compost tea; Org\_M, Organic cropping system with manure.

**Table S6. Mantel analysis of the relationships between the overall bacterial community and soil properties and N cycling genes.**

|                                    | Network Topology |    |                |       |                |       |
|------------------------------------|------------------|----|----------------|-------|----------------|-------|
|                                    | Conv             |    | Org_C          |       | Org_M          |       |
|                                    | r <sub>M</sub>   | P  | r <sub>M</sub> | P     | r <sub>M</sub> | P     |
| Soil properties                    | 0.09133          | ** | 0.06448        | **    | 0.07088        | **    |
| Functionality<br>(N cycling genes) | 0.2121           | ** | -0.001593      | 0.518 | -0.01519       | 0.728 |

Significant P values are indicated as \*P < 0.05; \*\*P < 0.01, \*\*\*P < 0.001, respectively. Conv, Conventional cropping system; Org\_C, Organic cropping system with compost and compost tea; Org\_M, Organic cropping system with manure; r<sub>M</sub> Mantel statistic r.
